# Supplementary material for: XIST-Promoter Demethylation as Tissue Biomarker for Testicular Germ Cell Tumors and Spermatogenesis Quality
Source: PubMed Central journal article supplement (PMC6769809; doi:10.3390/cancers11091385), 2019-09-17

# Supplementary Materials: *XIST*-Promoter Demethylation as Tissue Biomarker for Testicular Germ Cell Tumors and Spermatogenesis Quality

**Table 1.** Clinicopathological features of testicular germ cell tumor cases in the discovery cohort.

| Variables                                    | Cohort ( <i>n</i> = 156 cases)/Individual tumor samples ( <i>n</i> = 250) |
|----------------------------------------------|---------------------------------------------------------------------------|
| Age [years (median, IQR)]                    | 30 (25–36)                                                                |
| Histologic subtypes ( <i>n</i> , %)          |                                                                           |
| Seminoma                                     | 83 (53.2)                                                                 |
| Embryonal carcinoma                          | 10 (6.4)                                                                  |
| Teratoma, postpubertal-type                  | 3 (1.9)                                                                   |
| Mixed tumor                                  | 60 (38.5)                                                                 |
| Histologic subtypes detailed ( <i>n</i> , %) |                                                                           |
| Seminoma                                     | 106 (42.4)                                                                |
| Embryonal carcinoma                          | 56 (22.4)                                                                 |
| Yolk sac tumor, postpubertal-type            | 36 (14.4)                                                                 |
| Choriocarcinoma                              | 11 (4.4)                                                                  |
| Teratoma, postpubertal-type                  | 41 (16.4)                                                                 |
| Stage                                        |                                                                           |
| I                                            | 101 (64.7)                                                                |
| II                                           | 31 (19.9)                                                                 |
| III                                          | 24 (15.4)                                                                 |
| IGCCCG group (for metastatic disease)        |                                                                           |
| Good                                         | 42 (76.4)                                                                 |
| Intermediate                                 | 6 (10.9)                                                                  |
| Poor                                         | 7 (12.7)                                                                  |

**Abbreviations:** IGCCCG—International Germ Cell Cancer Collaborative Group; IQR – interquartile range.

**Table 2.** Clinicopathological features of testicular germ cell tumor cases in the validation cohort.

| Variables                           | Cohort ( <i>n</i> = 146)      |
|-------------------------------------|-------------------------------|
| Age [years (median, IQR)]           | 30 (25–38)                    |
| Histologic subtypes ( <i>n</i> , %) |                               |
| Seminoma                            | 64 (43.9)                     |
| Mixed tumors                        | 38 (26.0)                     |
| Embryonal carcinoma                 | 30 (20.6)                     |
| Yolk sac tumor, postpubertal-type   | 4 (2.7)                       |
| Choriocarcinoma                     | 4 (2.7)                       |
| Teratoma, postpubertal-type         | 6 (4.1)                       |
| Stage                               |                               |
| I                                   | 66 (69.5)                     |
| II                                  | 17 (17.9)                     |
| III                                 | 12 (12.6)                     |
| Variables                           | GCNIS cohort ( <i>n</i> = 17) |
| Age [years (median, IQR)]           | 32 (24–35)                    |

**Abbreviations:** IQR – interquartile

**Table 3.** Clinicopathological features of non-germ cell tumor cases in the discovery cohort.

| Variables                               | Cohort ( <i>n</i> = 54) |
|-----------------------------------------|-------------------------|
| Age [years (median, IQR)]               | 65 (42–77)              |
| Johnsen score ( <i>n</i> , %)           |                         |
| 0                                       | 1 (1.9)                 |
| 2                                       | 3 (5.6)                 |
| 3                                       | 12 (22.2)               |
| 4                                       | 2 (3.7)                 |
| 5                                       | 1 (1.9)                 |
| 6                                       | 1 (1.9)                 |
| 7                                       | 2 (3.7)                 |
| 8                                       | 8 (14.8)                |
| 9                                       | 15 (27.8)               |
| 10                                      | 9 (16.7)                |
| Reason for orchiectomy ( <i>n</i> , %)  |                         |
| Surgical castration (prostate cancer)   | 11 (20.4)               |
| Sex-cod/stromal tumor (Leydig, Sertoli) | 5 (9.3)                 |
| Adenomatoid tumor                       | 2 (3.7)                 |
| Inflammatory disease                    | 9 (16.7)                |
| Lymphoma/leukemia                       | 5 (9.3)                 |
| Other                                   | 21 (38.9)               |

**Abbreviations:** IQR – interquartile range.

**Table 4.** features of patients undergoing testicular biopsy for infertility issues in the validation cohort.

| Variables                     | Patient cohort ( <i>n</i> = 32) |
|-------------------------------|---------------------------------|
| Age [years (median, IQR)]     | 33 (29–39)                      |
| Johnsen score ( <i>n</i> , %) |                                 |
| 2–3                           | 16                              |
| 6–7                           | 2                               |
| 8–10                          | 14                              |

**Abbreviations:** IQR – interquartile range.

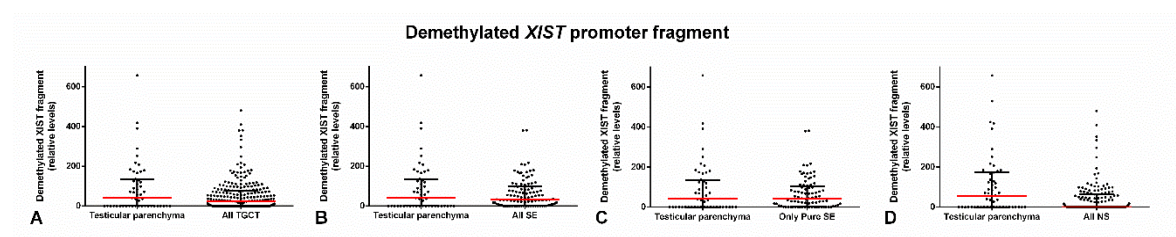

**Supplementary Figure 1.** Demethylated *XIST* fragment relative amounts in testicular germ cell tumors and testicular parenchyma of the discovery cohort. Relative amounts of the demethylated *XIST* fragment among testicular parenchyma samples and (A) all TGCT samples; (B) all SE samples; (C) only pure SE samples; and (D) all NS samples. Abbreviations: NS—non-seminoma; SE—seminoma; TGCT—testicular germ cell tumor.

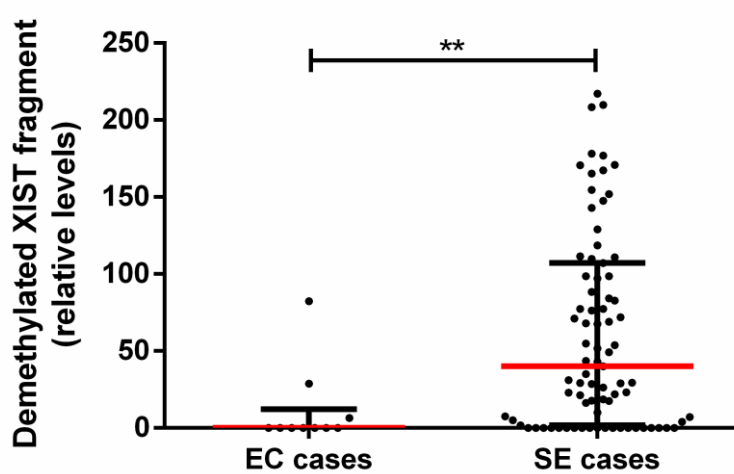

**Supplementary Figure 2.** Demethylated *XIST* fragment relative amounts in seminoma and embryonal carcinoma patients of the discovery cohort. \*\* indicates  $p < 0.01$ . Abbreviations: EC—embryonal carcinoma and SE—seminoma.

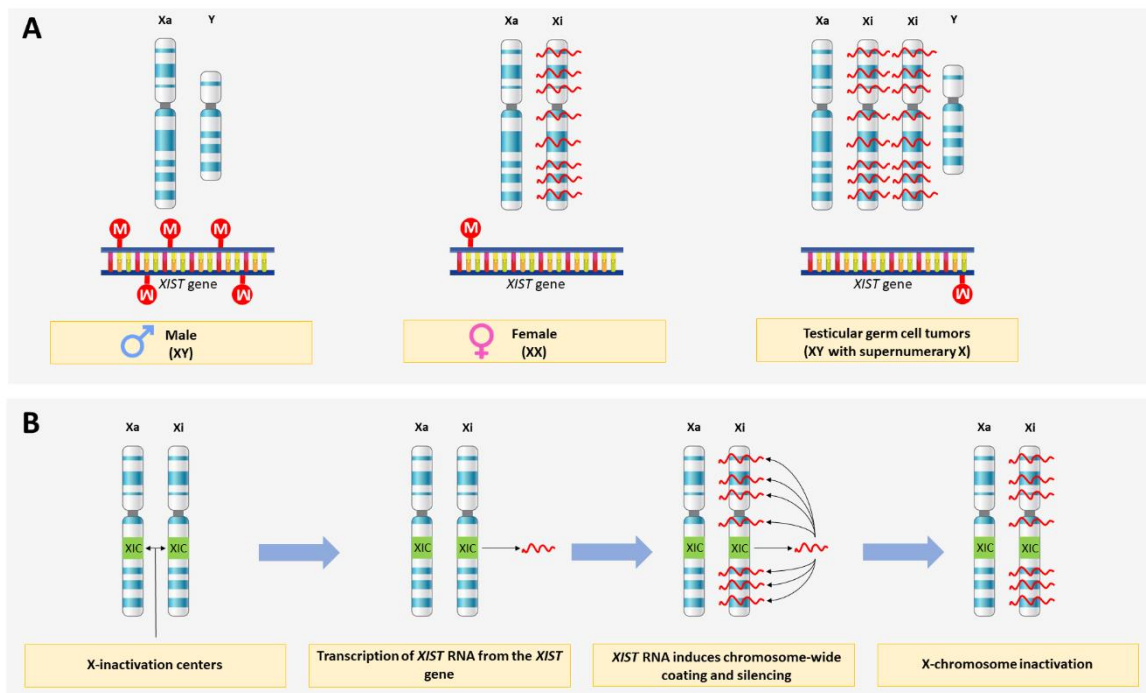

**Supplementary Figure 3.** *XIST* methylation and expression and X chromosome inactivation in humans. (A) Methylation status of the *XIST* promoter in somatic male cells (XY, both alleles methylated, no expression), in female somatic cells (XX, there is *XIST* demethylation and expression), and in TGCTs (gains of X chromosome, there is *XIST* demethylation and expression) and (B) mechanism of X chromosome inactivation, starting with transcription of the *XIST* lncRNA (encoded in the X chromosome inactivation centers) which induces chromatin modifications resulting in silencing of redundant X chromosome genes. Abbreviations: XIC – X inactivation centers; Xa – activated X chromosome; Xi – inactivated X chromosome.

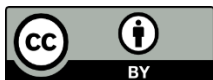

Supplement: cancers-11-01385-s001.pdf [file cancers-11-01385-s001.pdf]
